# Supplementary material
Source: PubMed Central journal article supplement (PMC6691399)
Supplement: jp9b04534_si_001.pdf [file jp9b04534_si_001.pdf]

# SUPPORTING INFORMATION

## Molecular Modelling of Structure and Dynamics of Nafion

### Protonation States

*Soumyadipta Sengupta*<sup>1,\*</sup>, *Alexey V. Lyulin*<sup>1,2</sup>

\* Corresponding Author

<sup>1</sup>Theory of Polymers and Soft Matter, Department of Applied Physics, Eindhoven University of Technology, Eindhoven 5600 MB, The Netherlands

<sup>2</sup>Center for Computational Energy Research, Department of Applied Physics, Eindhoven University of Technology, Eindhoven 5600 MB, The Netherlands

#### **I. Simulation Protocol**

All the simulation boxes were energy minimized using the conjugate gradient algorithm in LAMMPS<sup>1</sup>.  $T= 353$  K, the average operating temperature for PEMFCs, was chosen for the present simulations.

The equilibration and production runs were also carried out using LAMMPS software<sup>1</sup>. The NVT runs and annealing protocol followed is the same as employed in our previous study<sup>2</sup>. The system is cycled between 353 K and 600 K as part of the annealing schedule. After annealing and NVT equilibration, the sample was simulated under  $NpT$  conditions for another 8 ns at  $p=1$  atm and  $T=353$  K. The density of the sample has been stabilized after about 1.5 ns of  $NpT$  simulations. The last 3 ns of the  $NpT$  run was used for analysis.

The Nose-Hoover style thermostat and barostat<sup>3,4</sup> in LAMMPS<sup>1</sup> were used for maintaining the temperature and pressure, as imposed during the NVT/NpT simulation. The Verlet integration algorithm<sup>5</sup> was used for time integration of the equations of motion. The PPPM solver was used for the electrostatics. The cutoff for the non-bonded interactions was set at 10 Å. The time step was equal to 1 fs for all the simulations.

During the last 3 ns of the NpT simulation, particles trajectories were saved every 1 ps for structural and dynamic property analysis. The RDFs and average water cluster sizes showed minimal variation during this time.

## II. Sulfur-Oxygen (water) Radial Distribution Functions

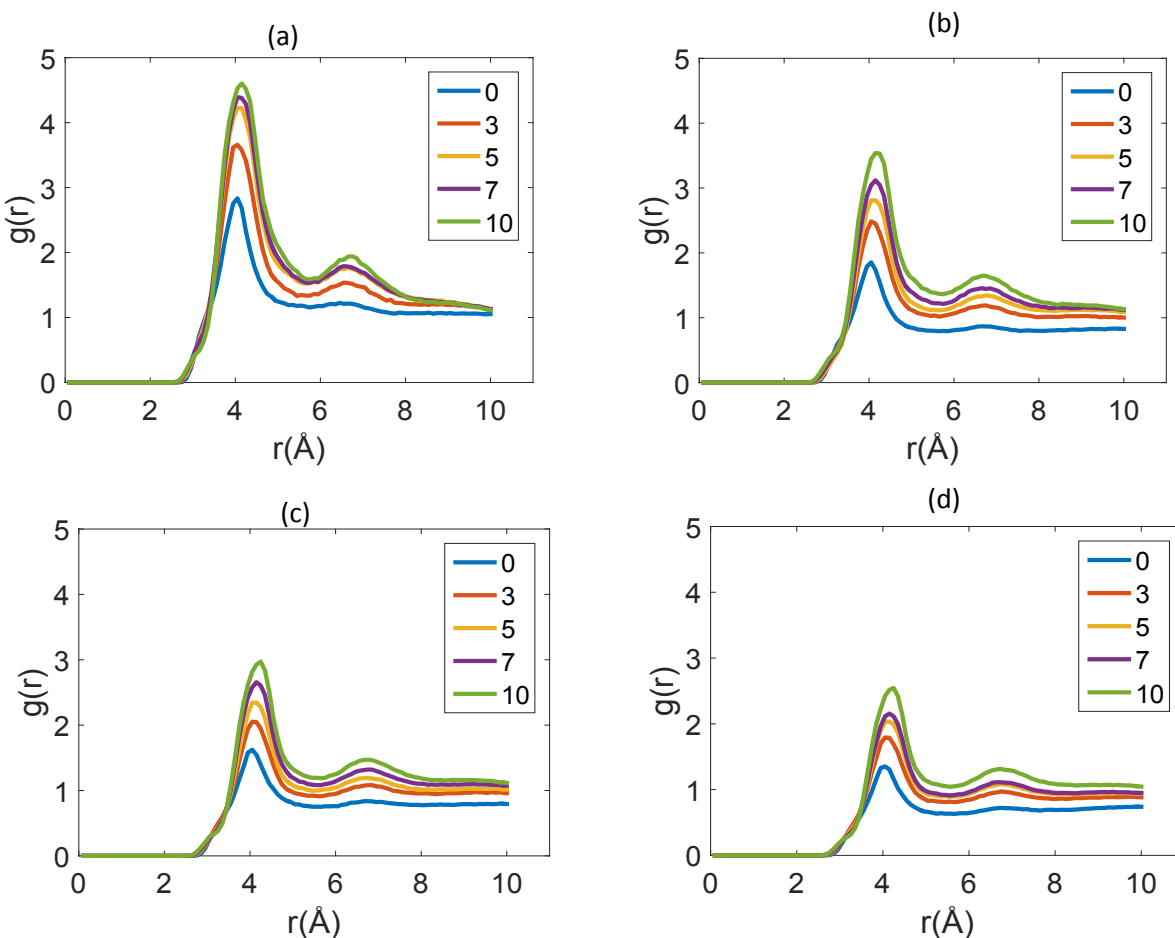

Figure S1. S-Ow (Sulfur- Oxygen (water)) radial distribution functions for DDP= 0, 3, 5, 7, 10 for (a)  $\lambda = 5$  (b)  $\lambda = 10$  (c)  $\lambda = 15$  (d)  $\lambda = 20$

### III. Sulfur-Oxygen (hydronium) Radial Distribution Functions

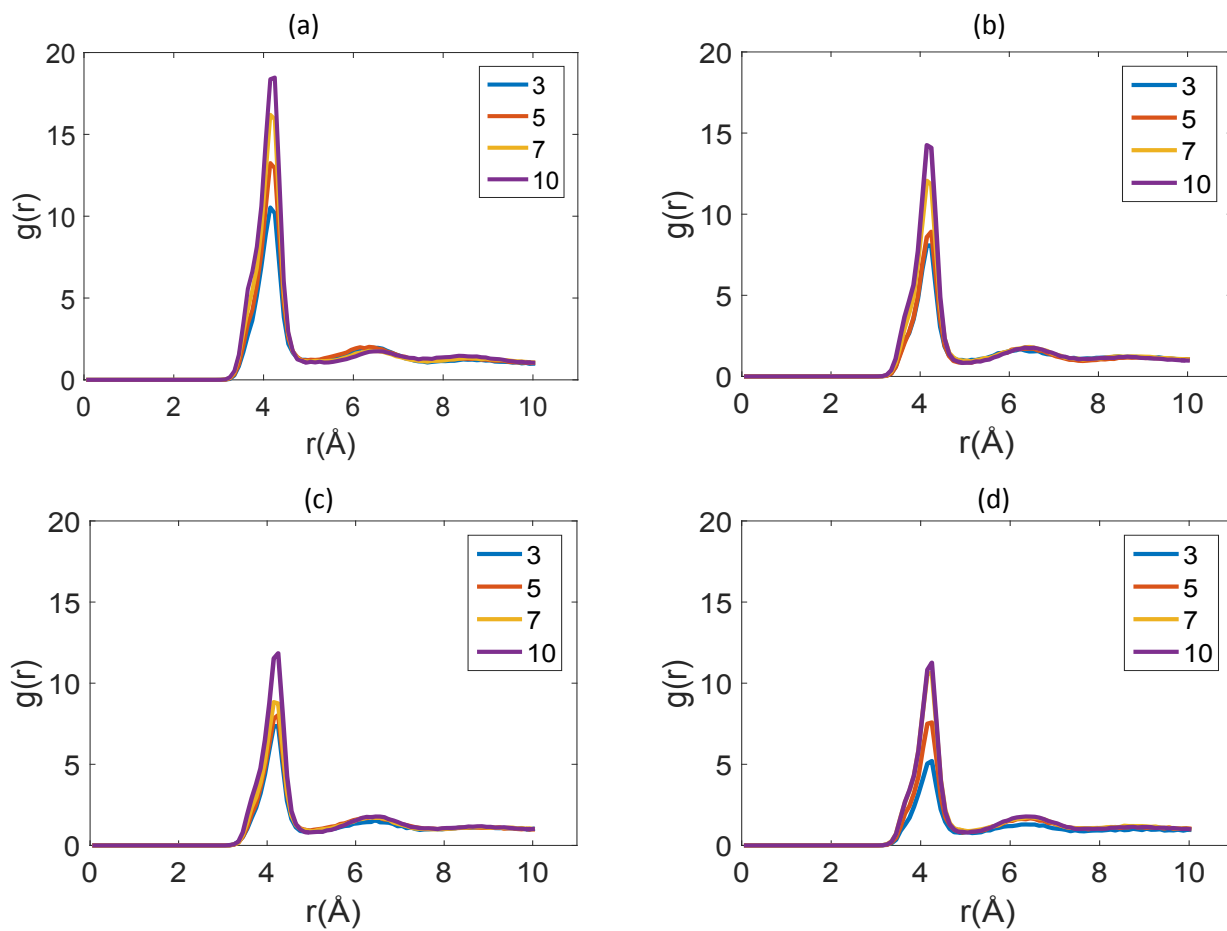

Figure S2. S-Oh (Sulfur- Oxygen (hydronium)) radial distribution functions for DDP= 3, 5, 7, 10 for (a)  $\lambda = 5$  (b)  $\lambda = 10$  (c)  $\lambda = 15$  (d)  $\lambda = 20$

#### IV. Oxygen (Water) -Oxygen (Water) Radial Distribution Functions

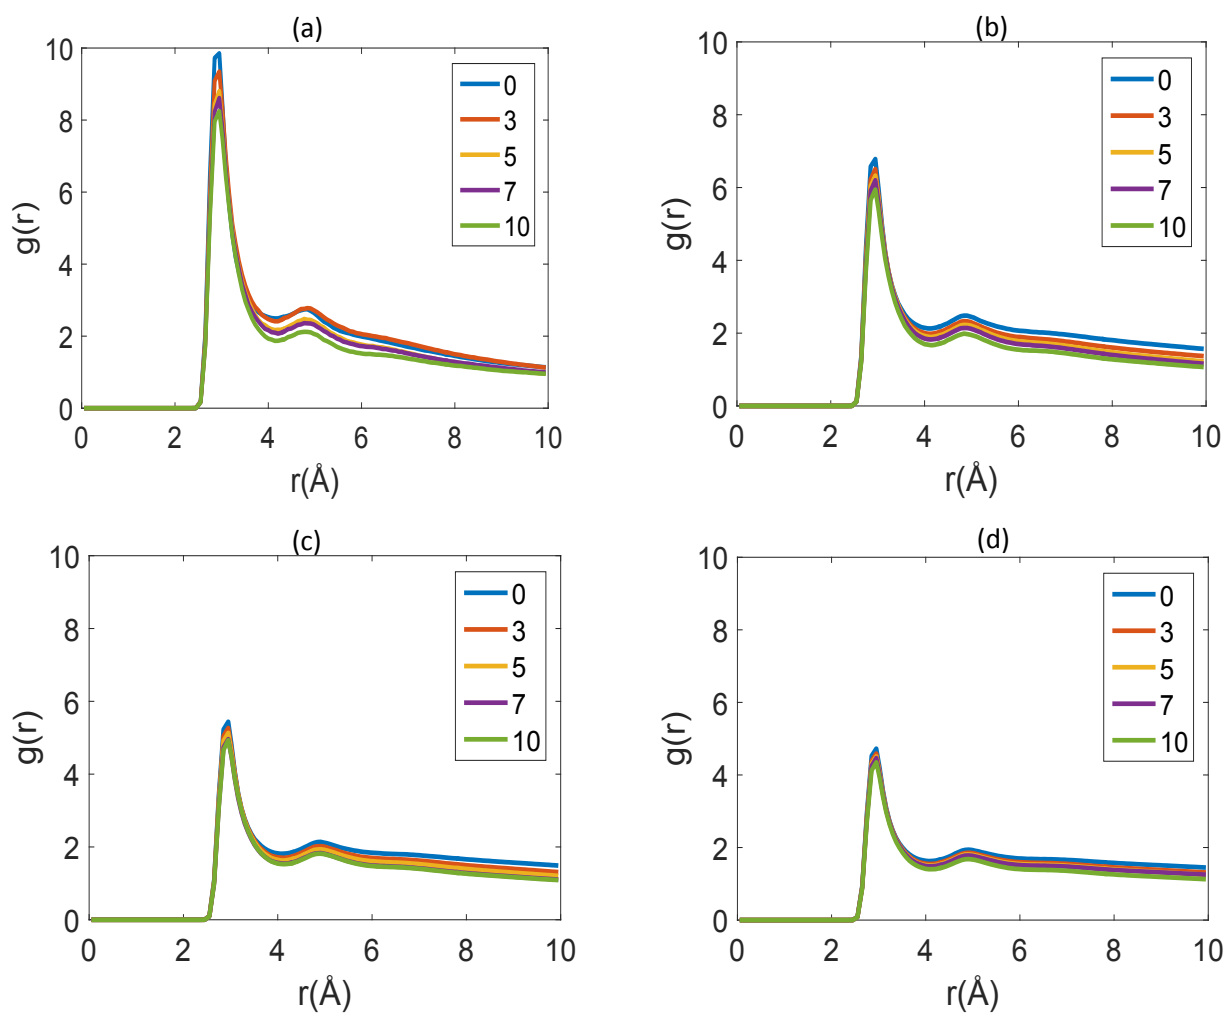

Figure S3. Ow-Ow (Oxygen (water) - Oxygen (water)) radial distribution functions for DDP= 0, 3, 5, 7, 10 for (a)  $\lambda = 5$  (b)  $\lambda = 10$  (c)  $\lambda = 15$  (d)  $\lambda = 20$

## V. Oxygen (hydronium) -Oxygen (Water) Radial Distribution Functions

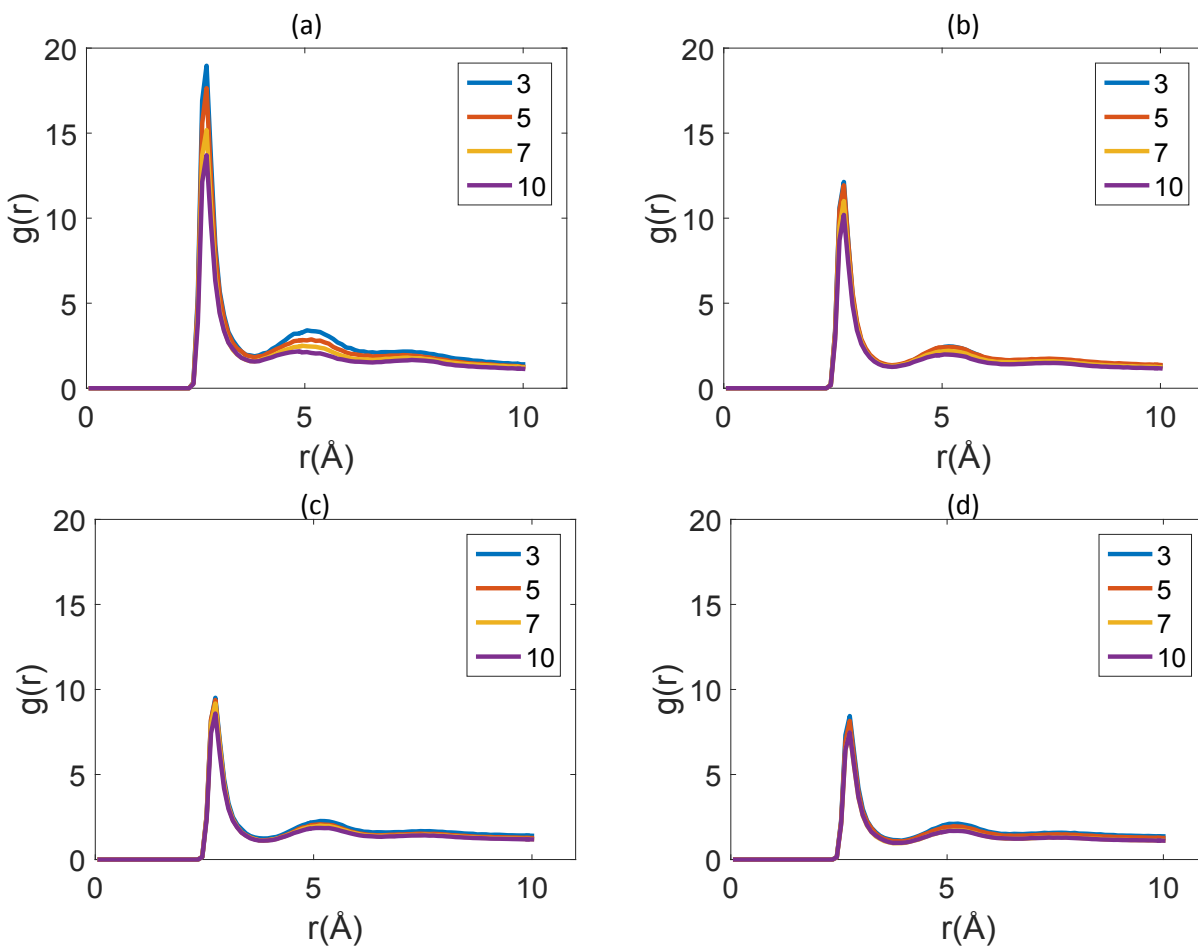

Figure S4. Ow-Ow (Oxygen (hydronium) - Oxygen (water)) radial distribution functions for DDP= 3, 5, 7, 10 for (a)  $\lambda = 5$  (b)  $\lambda = 10$  (c)  $\lambda = 15$  (d)  $\lambda = 20$

## VI. Water Phase Structure Factors

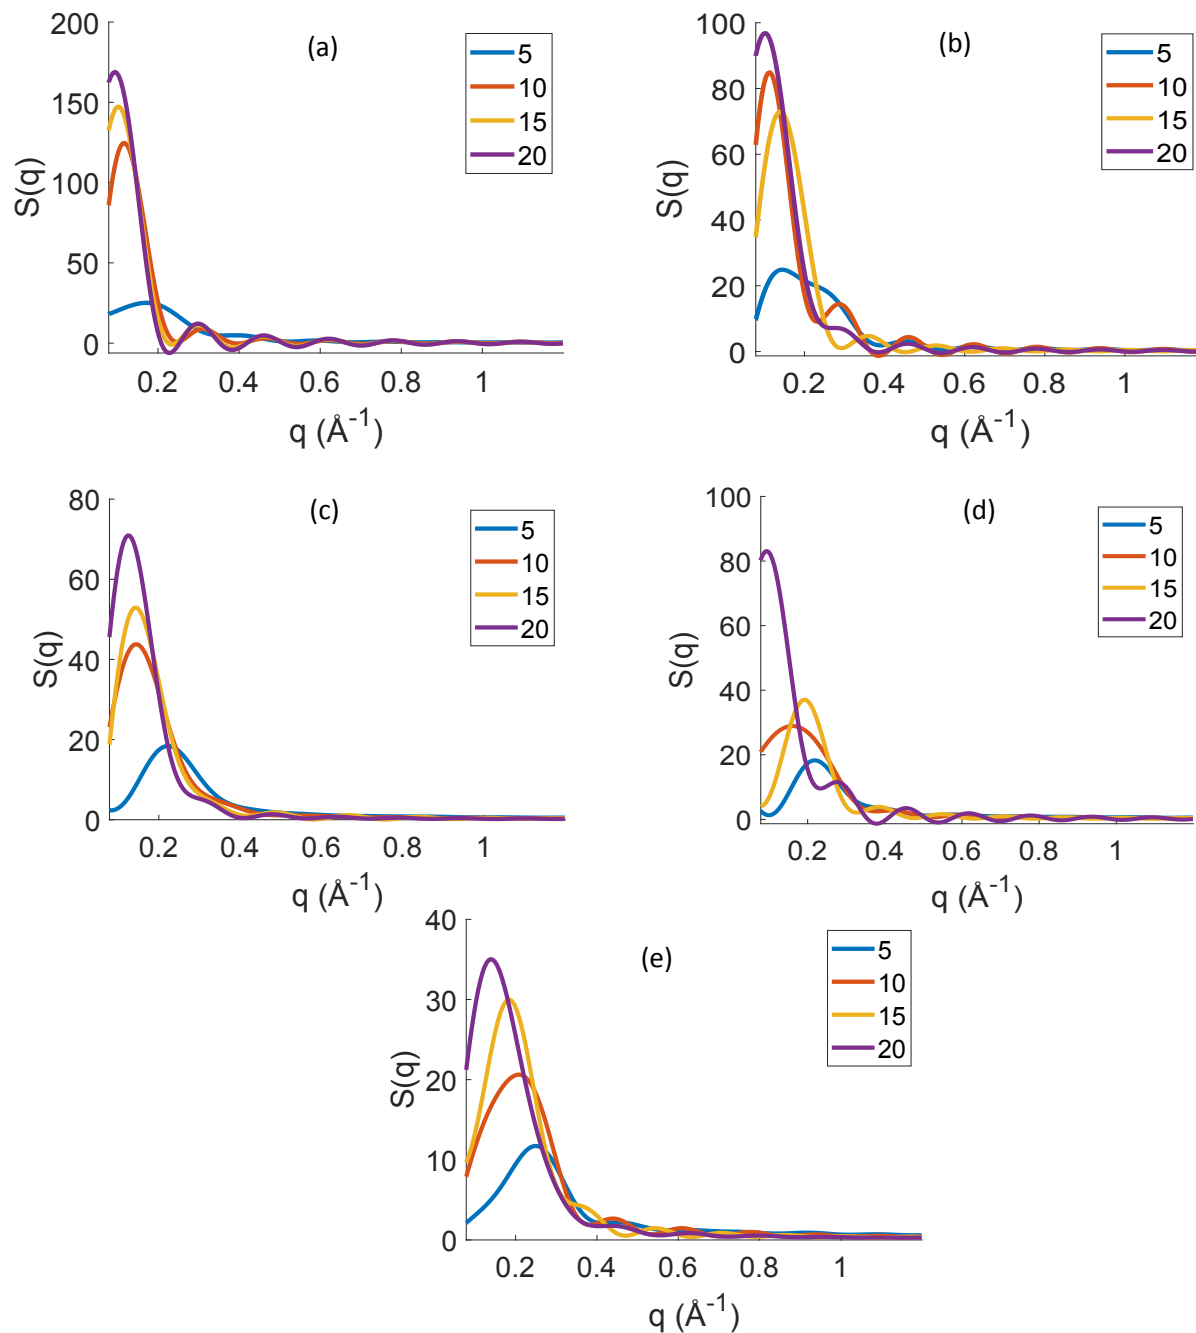

Figure S5. Water phase structure factors for  $\lambda = 5, 10, 15, 20$  at (a) DDP = 0 (b) DDP = 3 (c) DDP = 5 (d) DDP = 7 (e) DDP = 10

The structure factors have been computed by the Fourier transform, Equation 1 of the main text, of the radial distribution functions (RDFs) of the oxygen (water and hydronium) – oxygen (water and hydronium). These RDFs are very similar to oxygen (water) – oxygen (water) RDFs (Figure S3). The wave numbers corresponding to the peak locations are very close to the experimental values<sup>6</sup>. Also, the peaks, on average, shift towards smaller wave numbers with increasing hydration level ( $\lambda$ ), at all DDP levels, due to the increasing water domain sizes with increasing hydration.

## VII. Water Cluster Distribution

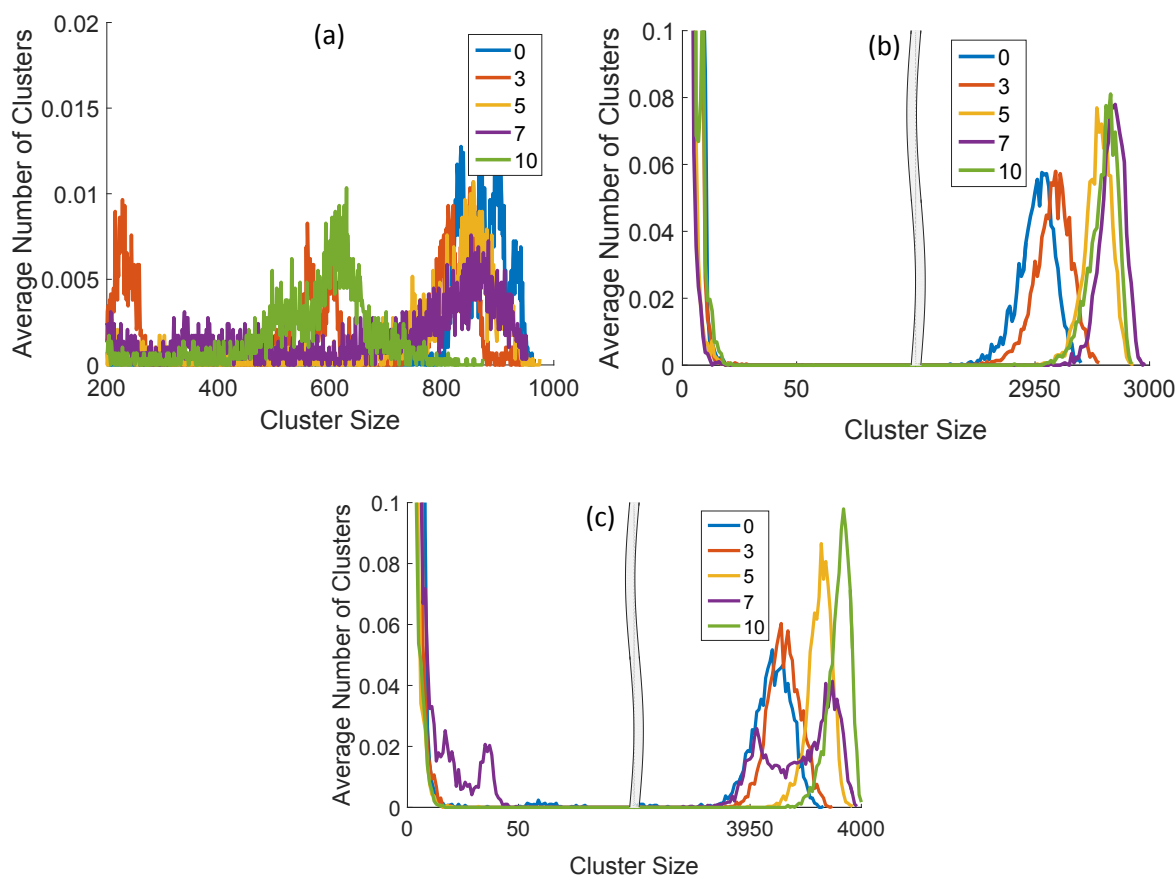

Figure S6. Hydrophilic/water phase cluster distributions for DDP=0, 3, 5, 7, 10 for (a)  $\lambda = 5$  (b)  $\lambda = 15$  (c)  $\lambda = 20$ . The average number of clusters for cluster sizes  $< 10$  in parts (a), (b) and (c) are well beyond the vertical scales. Average number of clusters is directly proportional to the occurrence frequency of a particular cluster size in the averaging interval of 3 ns. Hydrophilic/water phase contains both water molecules and hydronium ions.

## VIII. Hydrogen Bond Count

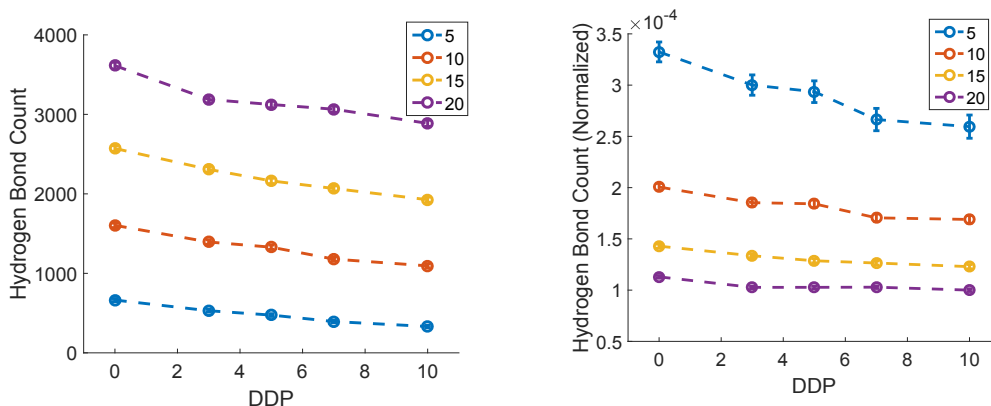

Figure S7. Hydrogen bond count for DDP = 0, 3, 5, 7, 10 at  $\lambda = 5, 10, 15, 20$  (a) water-water hydrogen bonds (b) normalized count for water-water hydrogen bonds

## IX. Mean Square Displacements (Overall) of water and hydronium

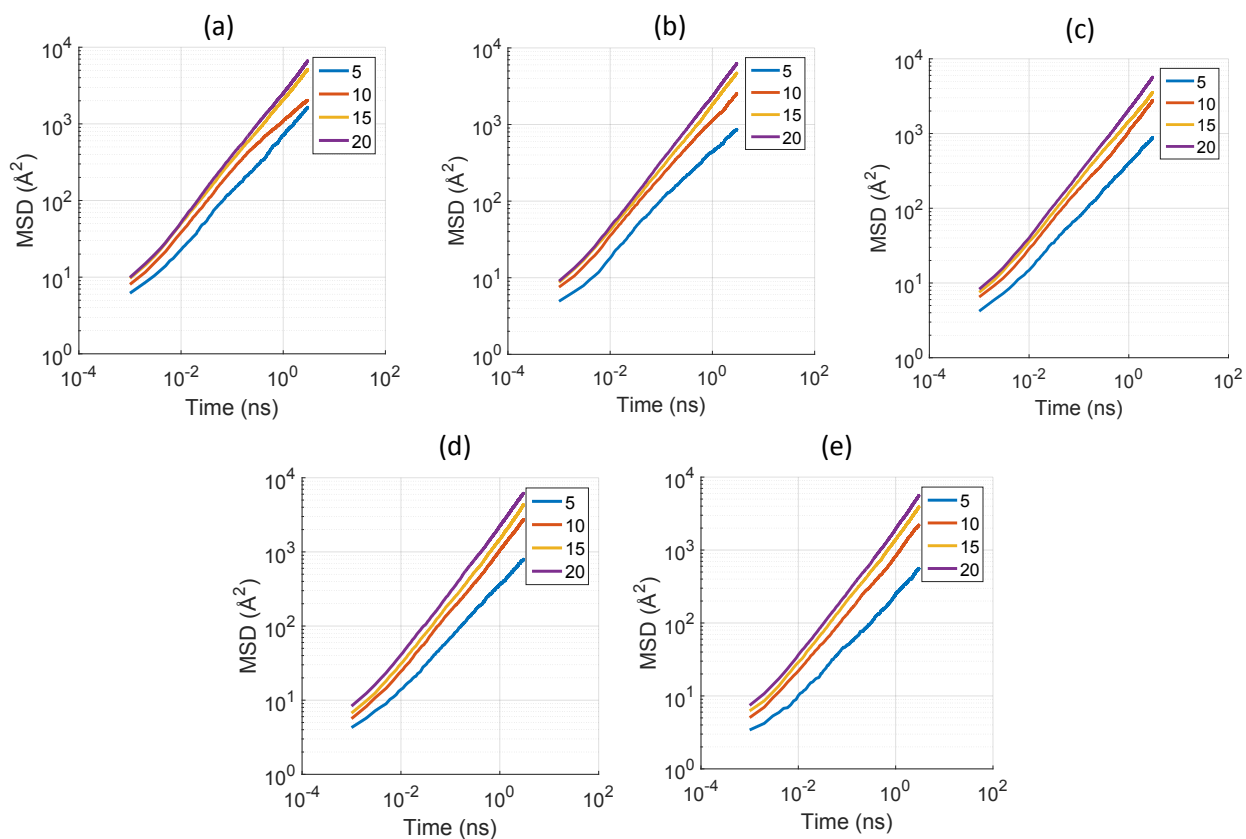

Figure S8. MSD for water molecule center of mass for  $\lambda = 5, 10, 15, 20$  for (a) DDP= 0 (b) DDP= 3 (c) DDP= 5 (d) DDP= 7 (e) DDP= 10



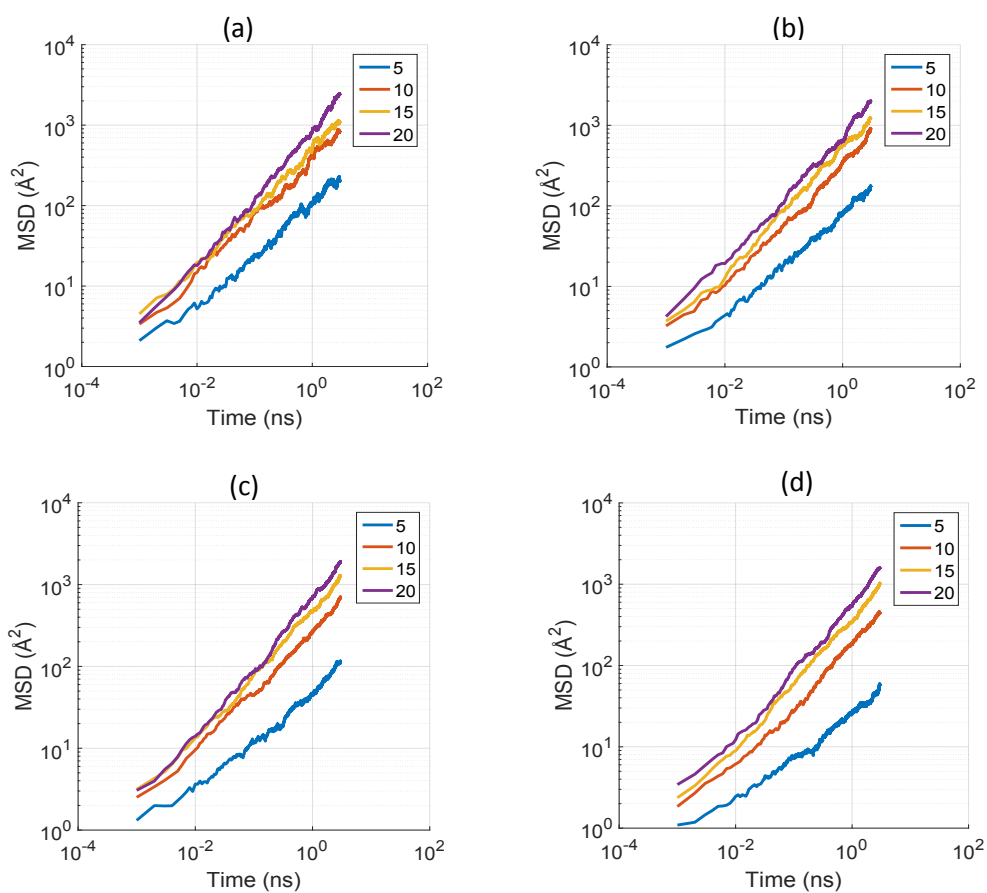

Figure S9. MSD for hydronium ion center of mass for  $\lambda = 5, 10, 15, 20$  for (a) DDP=3 (b) DDP=5 (c) DDP=7 (d) DDP=10

## X. Mean Square Displacement (within 4.2 Å of sulfur) of water and hydronium

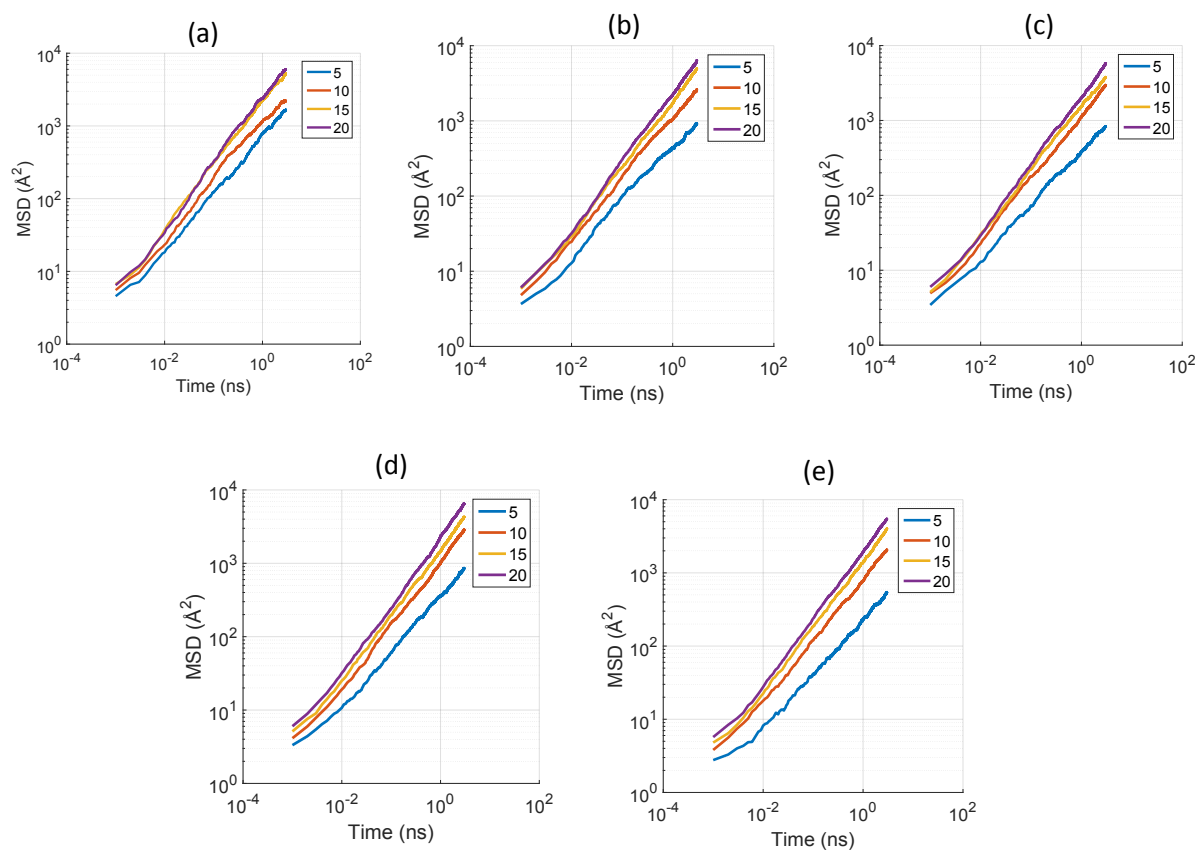

Figure S10. MSD for water molecule center of mass for  $\lambda = 5, 10, 15, 20$  for (a) DDP= 0 (b) DDP= 3(c) DDP= 5 (d) DDP= 7 (e) DDP= 10 within 4.2 Å of sulfur atoms of the sulfonic acid groups

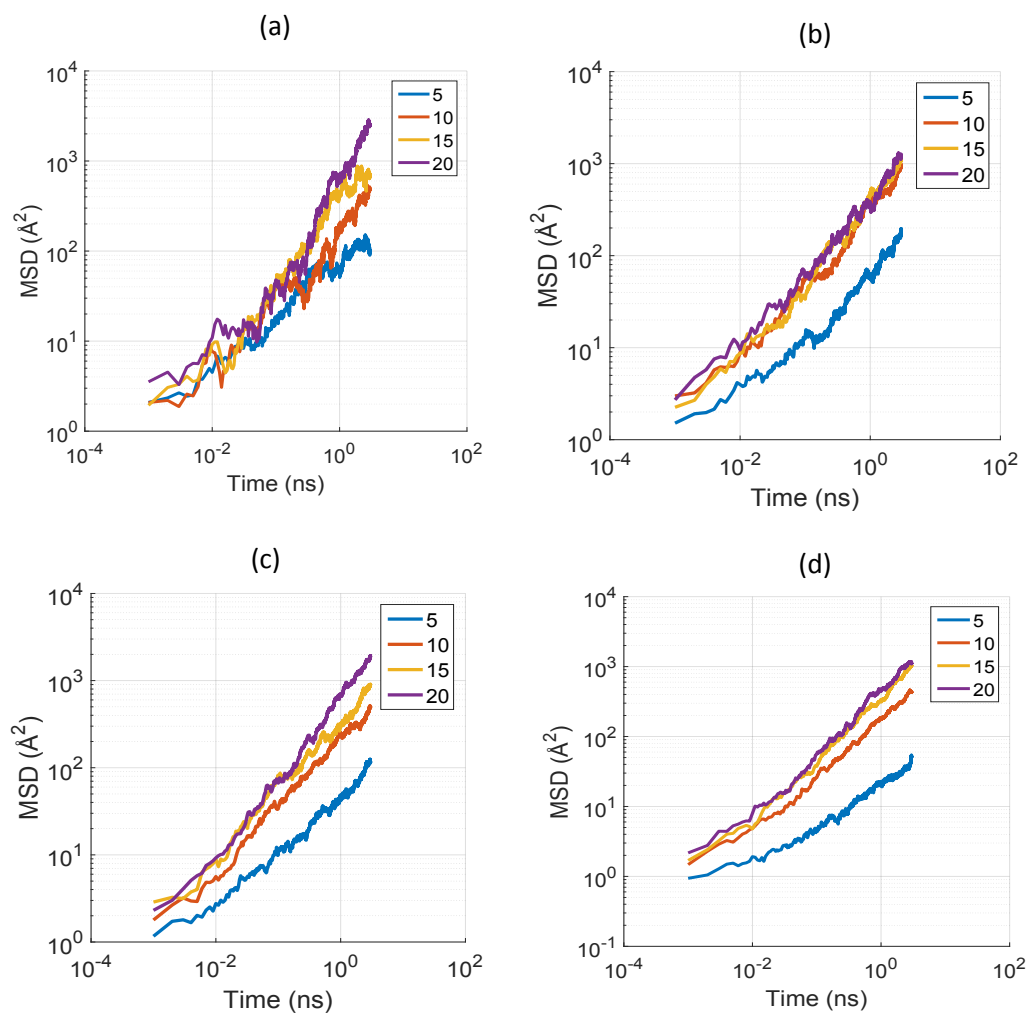

Figure S11. MSD for hydronium ion center of mass for  $\lambda = 5, 10, 15, 20$  for (a) DDP= 3 (b) DDP= 5 (c) DDP= 7 (d) DDP= 10 within  $4.2 \text{ \AA}$  of sulfur atoms of the sulfonic acid groups

## XI. Diffusion coefficients (within $4.2 \text{ \AA}$ of sulfur) of water and hydronium

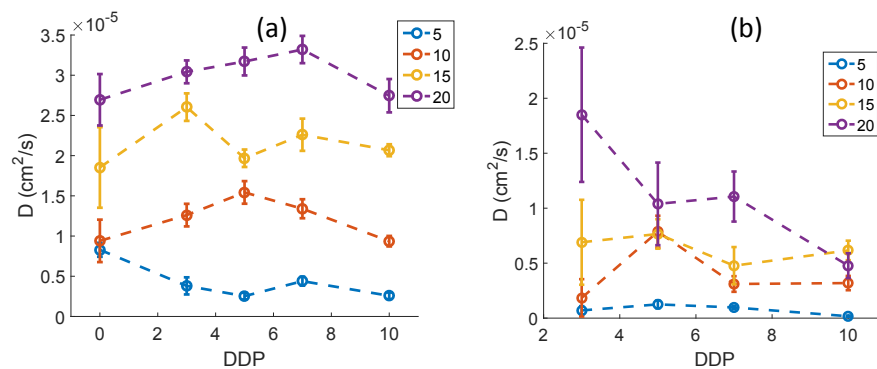

Figure S12. Diffusion coefficients for DDP= 0, 3, 5, 7, 10 at  $\lambda = 5, 10, 15, 20$  of center of mass of (a) water molecules (b) hydronium ions whose oxygen atoms are within  $4.2 \text{ \AA}$  of sulfur atoms of sulfonic acid groups

## XII. Residence Time and $\beta$ coefficient of water and hydronium

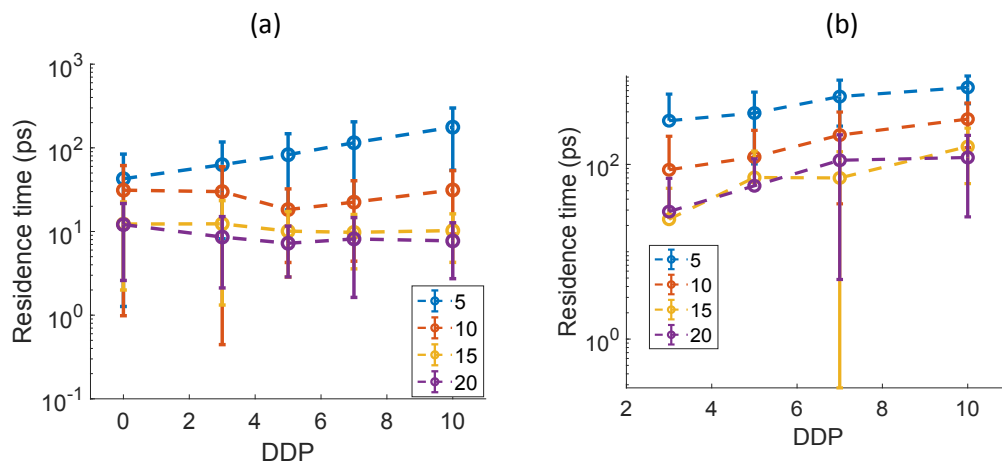

Figure S13. Residence time extracted using exponential fit (Equation S1), for DDP= 0, 3, 5, 7, 10 at  $\lambda = 5, 10, 15, 20$  (a) of oxygen (water molecules) and (b) oxygen (hydronium ions)

### Exponential fit

In addition to the stretched exponential fit, an exponential fit of the correlation function  $C(t)$

$$C(t) = a * \exp\left(-\left(\frac{t}{\tau}\right)\right) \dots \dots \dots S1$$

was also used to get the residence times. Here  $C(t)$  is described in Equation 2 of the main text and  $\tau$  is the residence time

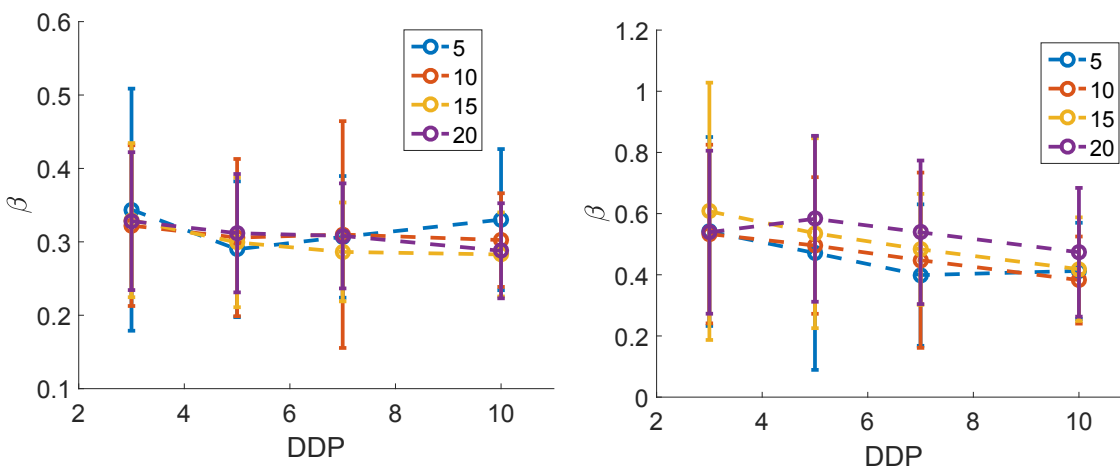

Figure S14.  $\beta$  coefficient value extracted from the stretched exponential fit, Equation 3 of the main text, of the correlation function, Equation 2 of the main text, for different DDP= 0, 3, 5, 7, 10 at  $\lambda = 5, 10, 15, 20$  for (a) oxygen (water molecules) (b) oxygen (hydronium ions)

## REFERENCES

- (1) Plimpton, S. Fast Parallel Algorithms for Short Range Molecular Dynamics. *J. Comput. Phys.* **1995**, *117* (March), 1–42.
- (2) Sengupta, S.; Lyulin, A. V. Molecular Dynamics Simulations of Substrate Hydrophilicity and Confinement Effects in Capped Nafion Films. *J. Phys. Chem. B* **2018**, *122* (22), 6107–6119.
- (3) Martyna, G. J.; Tobias, D. J.; Klein, M. L. Constant Pressure Molecular Dynamics Algorithms. *J. Chem. Phys.* **1994**, *101* (5), 4177–4189.
- (4) Shinoda, W.; Shiga, M.; Mikami, M. Rapid Estimation of Elastic Properties by Molecular Dynamics under Constant Stress. *Phys. Rev. B* **2004**, *69* (2004), 134103.
- (5) Verlet, L. Computer “Experiments” on Classical Fluids. I. Thermodynamical Properties of Lennard-Jones Molecules. *Phys. Rev.* **1967**, *159* (1), 98–103.
- (6) Perrin, J. C.; Lyonnard, S.; Volino, F. Quasielastic Neutron Scattering Study of Water Dynamics in Hydrated Nafion Membranes. *J. Phys. Chem. C* **2007**, *111* (8), 3393–3404.
